# Supplementary material for: A crystallography-based investigation of weak interactions for drug design against COVID-19
Source: Royal Society of Chemistry journal article supplement (doi:10.1039/d0cp05714b), 2021-01-01
Supplement: d0cp05714b1.pdf [file d0cp05714b1.pdf]

## **Crystallography based investigation of weak interaction for drug designing against COVID-19**

Nayim Sepay,<sup>\*a,b</sup> Pranab Saha,<sup>a</sup> Zarrin Shahzadi,<sup>b</sup> Aratrika Chakraborty<sup>b</sup> and Umesh Chandra Halder<sup>\*a</sup>

<sup>a</sup>Department of Chemistry, Jadavpur University, Kolkata 700 032, India

<sup>b</sup>Department of Chemistry, Lady Brabourne College, Kolkata 700 017, India.

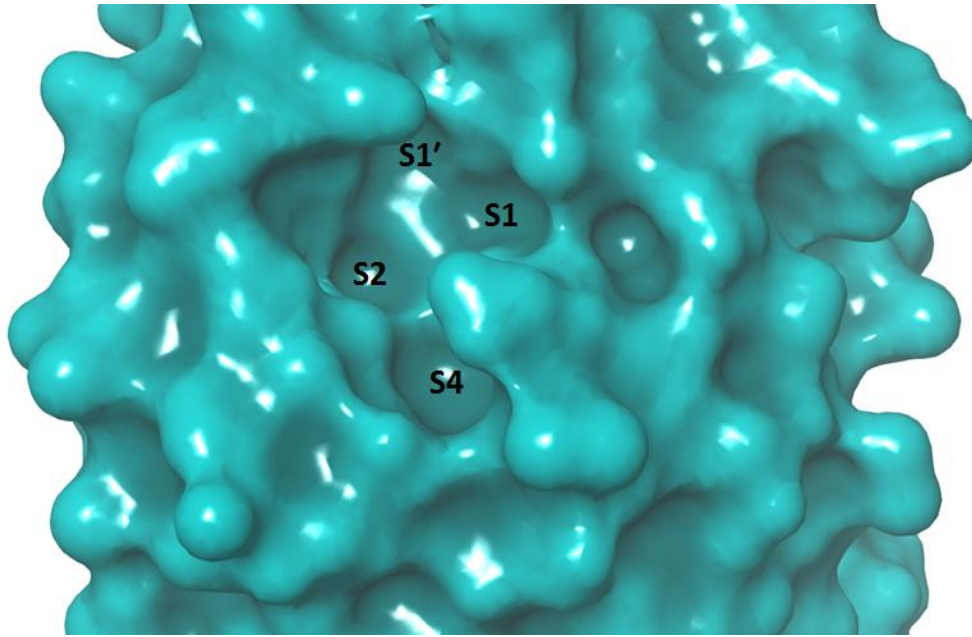

**Figure S1:** The major domains inside the active site of SARS-CoV-2 M<sup>pro</sup> protein

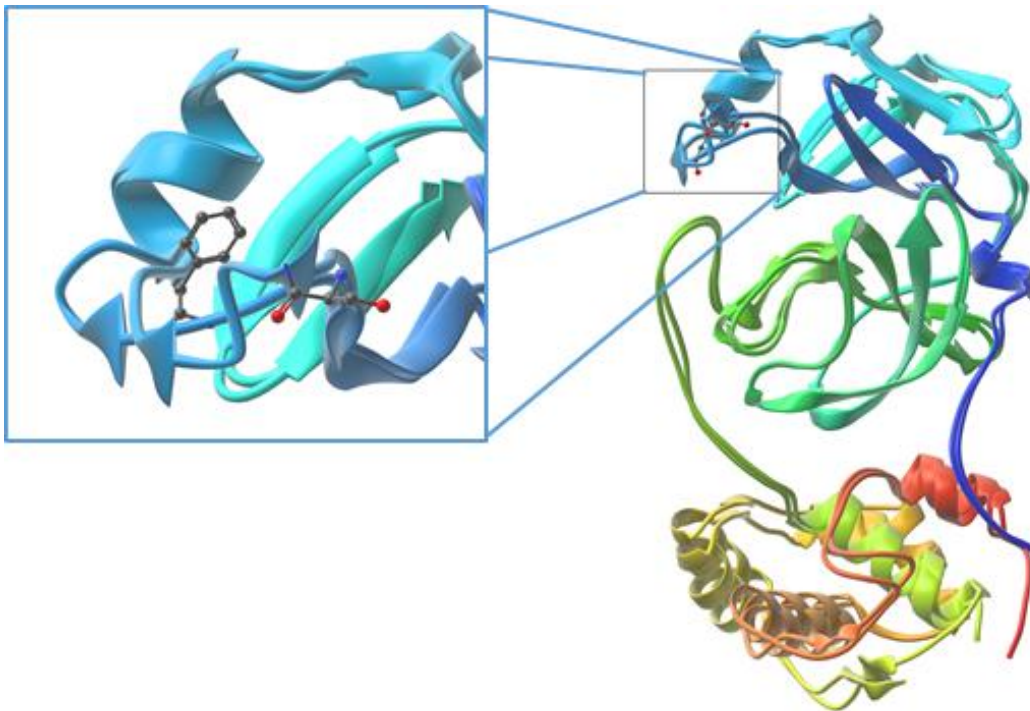

**Figure S2:** The mutation of amino acid 46 of SARS-CoV M<sup>pro</sup> with Ser residue was found at the active site of SARS-CoV-2 M<sup>pro</sup> (PDB ids of SARS-CoV M<sup>pro</sup> and SARS-CoV-2 M<sup>pro</sup> is 1P9S and 6LU7).

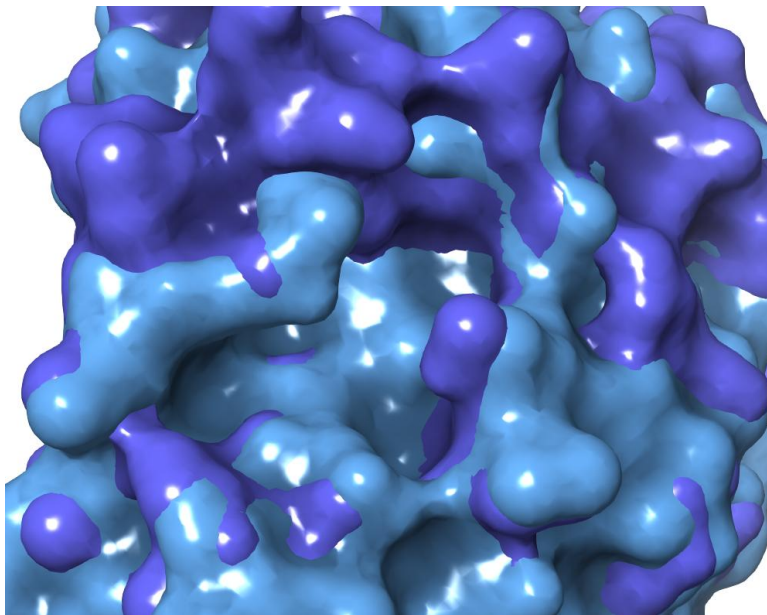

**Figure S3:** The change of depth and size of the active site of SARS-CoV-2 M<sup>pro</sup> for the mutation (PDB ids of SARS-CoV M<sup>pro</sup> and SARS-CoV-2 M<sup>pro</sup> is 1P9S and 6LU7 ).

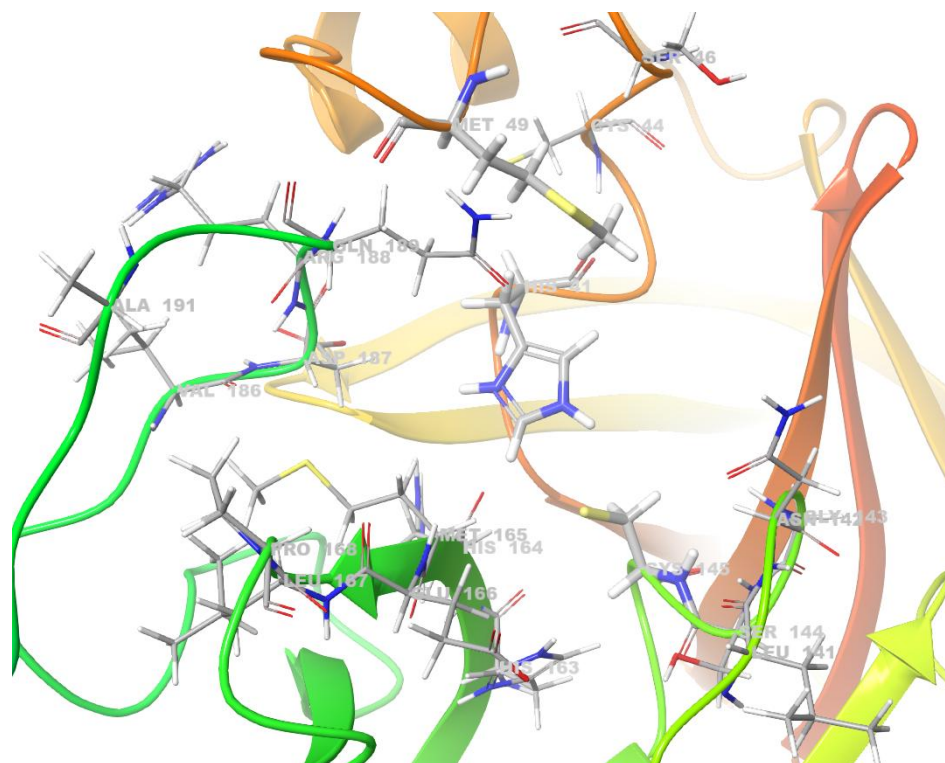

**Figure S4:** The constituent amino acid residues of SARS-CoV-2 M<sup>pro</sup>.

## Covalently attached small molecules

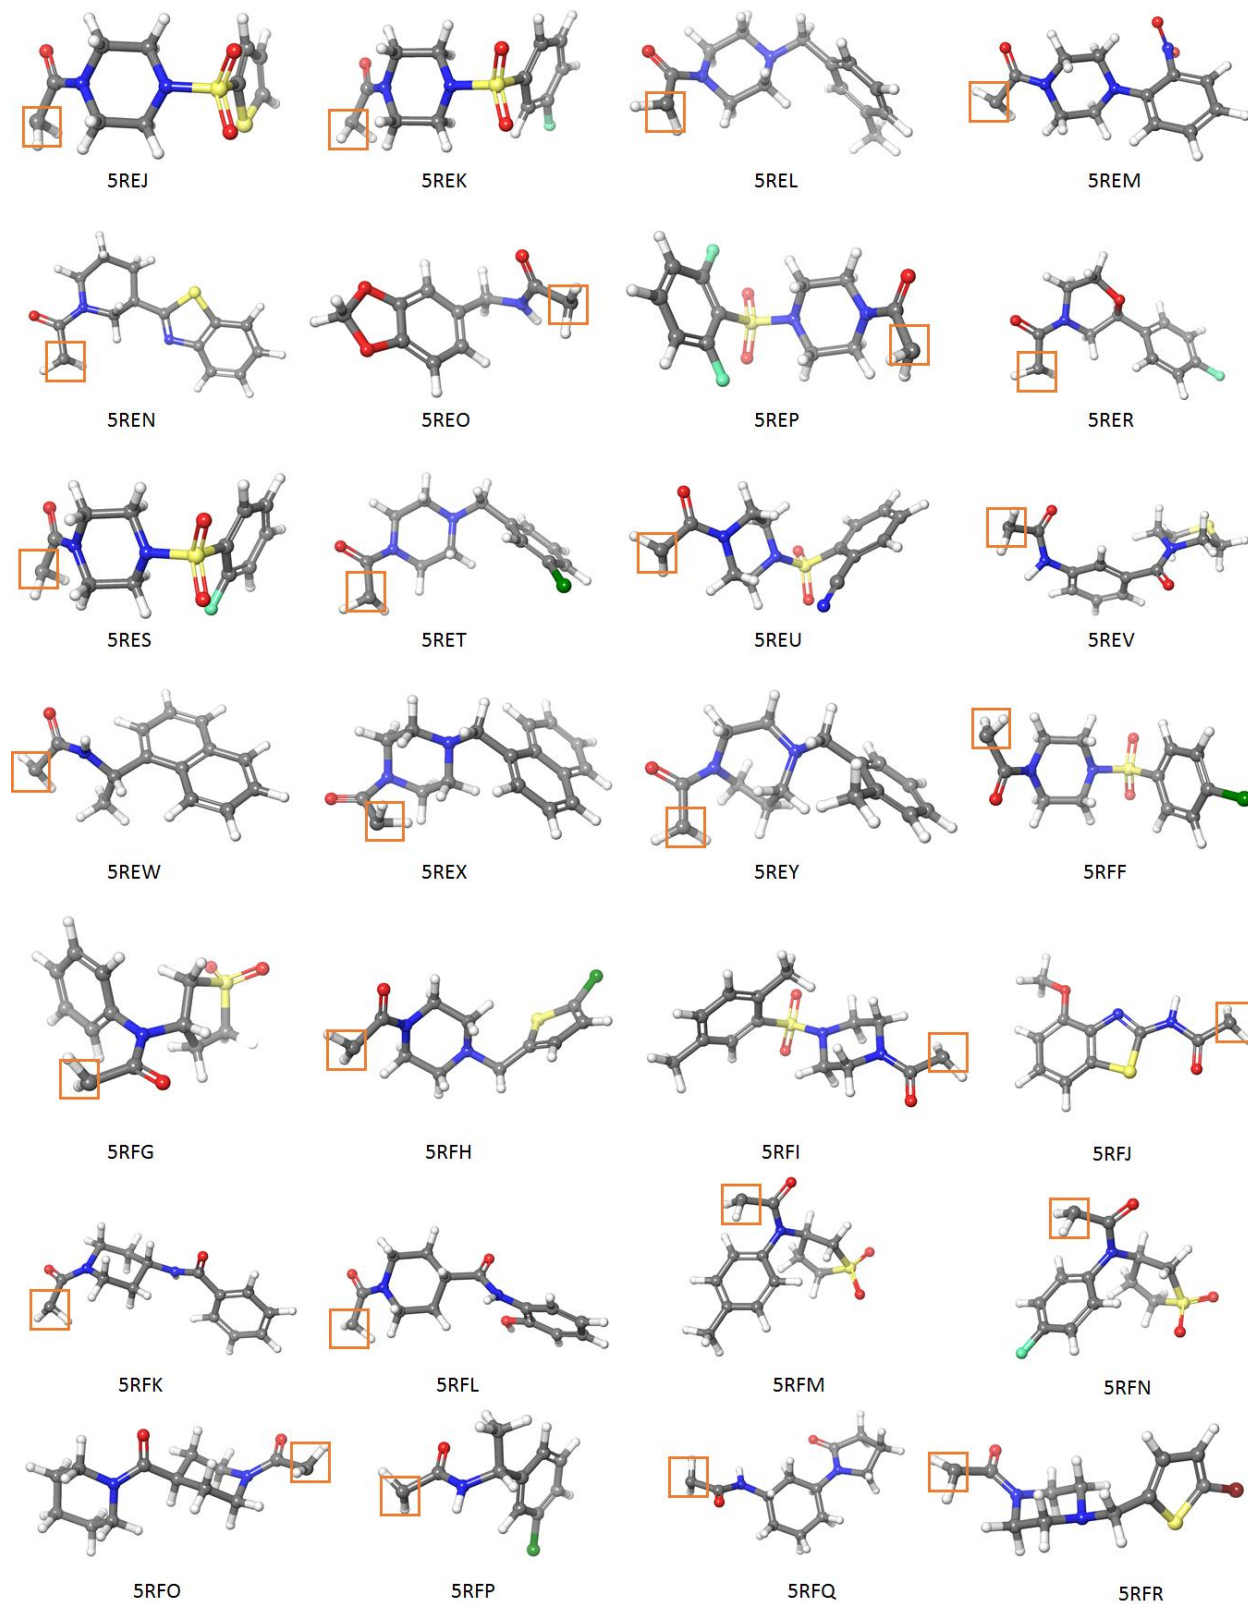

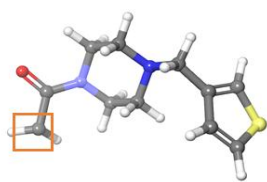

5RFS

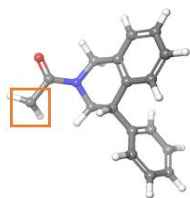

5RET

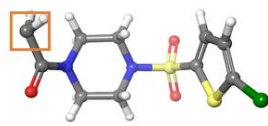

5REU

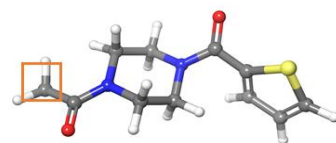

5REV

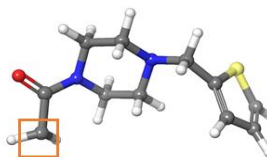

5RFW

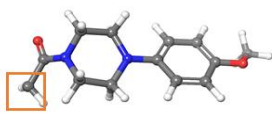

5RFX

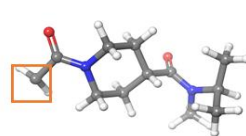

5RFY

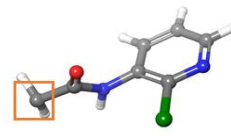

5RFZ

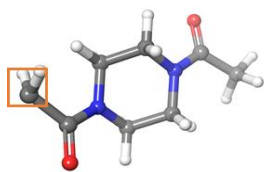

5RGO

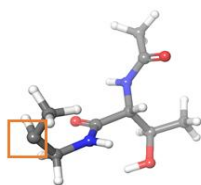

5RG2

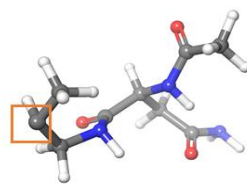

5RG3

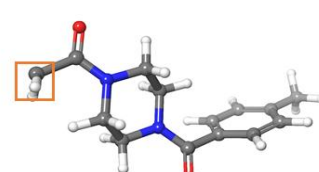

5RGL

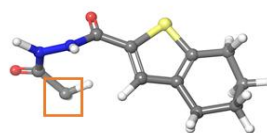

5RGM

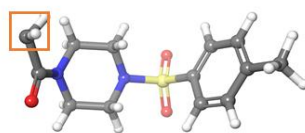

5RGN

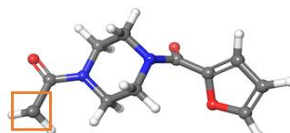

5RGO

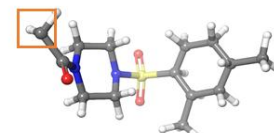

5RGP

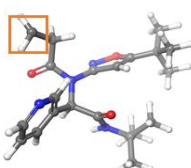

5RGT

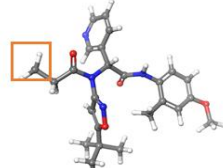

5RH5

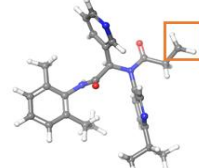

5RH6

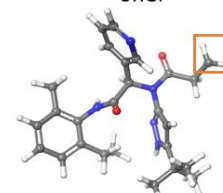

5RH7

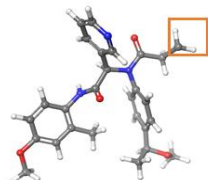

5RH9

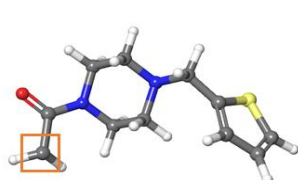

5RHA

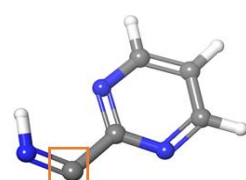

5RHB

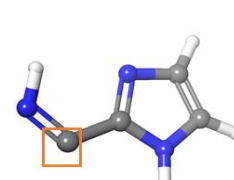

5RHC

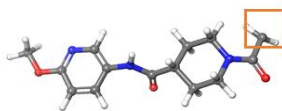

5RHE

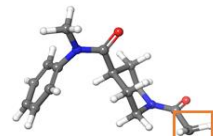

5RHF

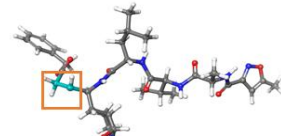

6LU7

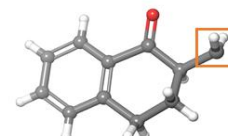

6YNQ

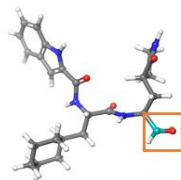

6LZE

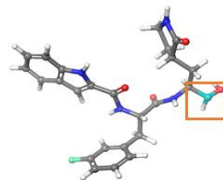

6MOK

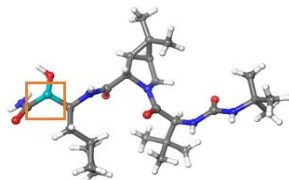

6WNP

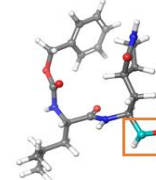

6WTJ

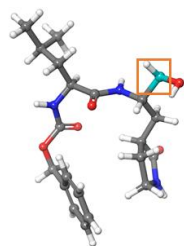

6WTK

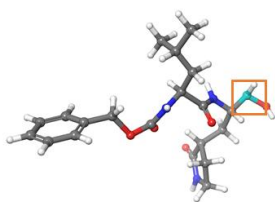

6WTM

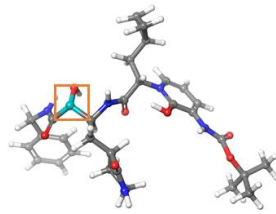

6Y2F

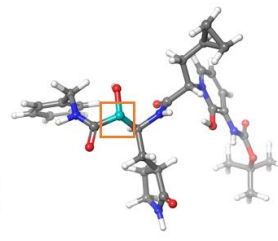

6Y2G

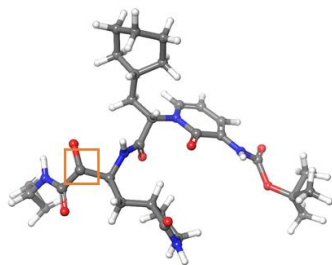

6Y7M

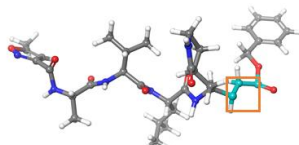

7BQY

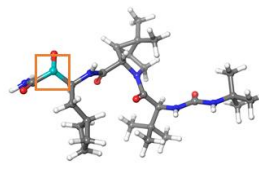

7BRP

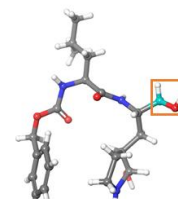

7BRR

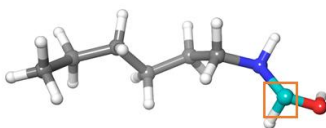

7BUY

### Non-covalently attached small molecules

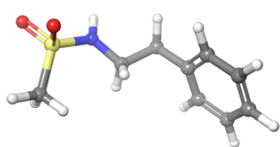

5R7Y

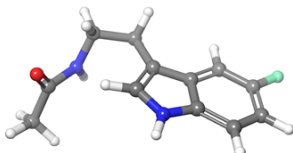

5R7Z

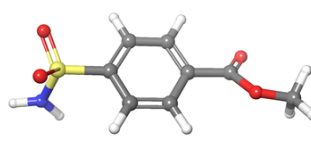

5R80

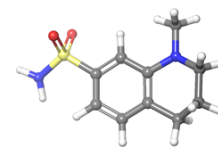

5R81

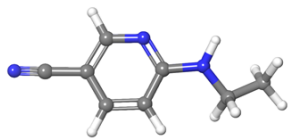

5R82

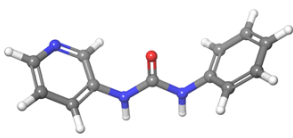

5R83

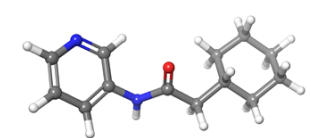

5R84

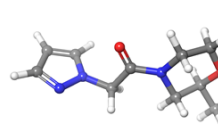

5R89

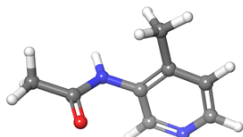

5RE4

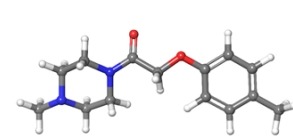

5RE9

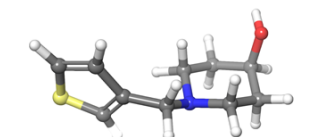

5REB

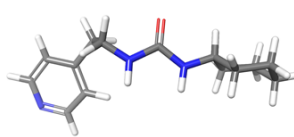

5REH

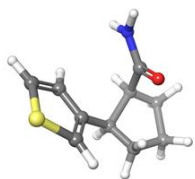

5REZ

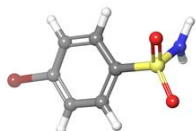

5RF1

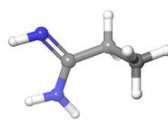

5RF2

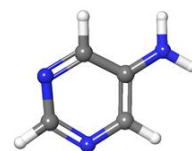

5RF3

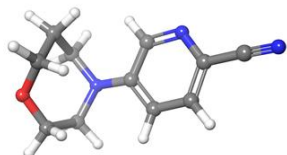

5RF6

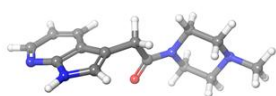

5RF7

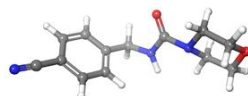

5REE

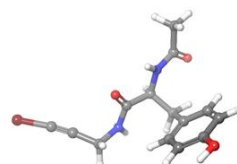

5RG1

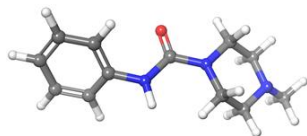

5RGG

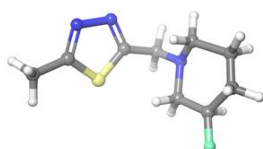

5RGH

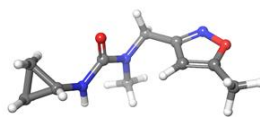

5RGI

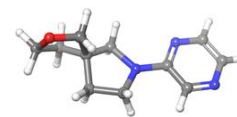

5RGJ

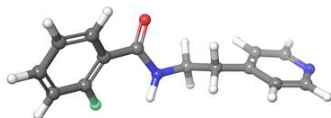

5RGK

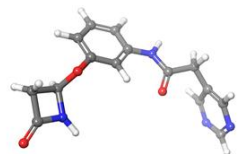

5RGU

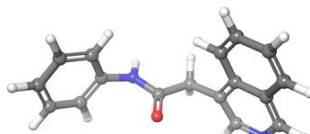

5RGV

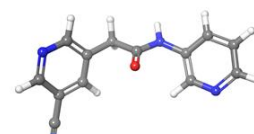

5RGW

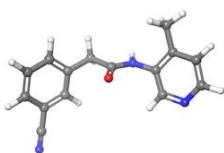

5RGX

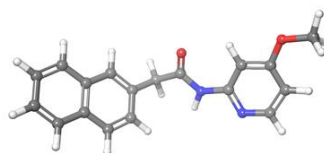

5RGY

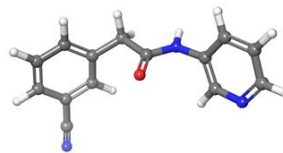

5RGZ

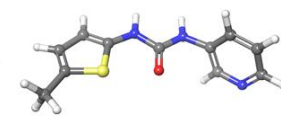

5RH0

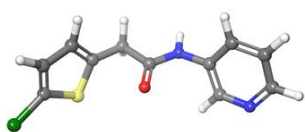

5RH1

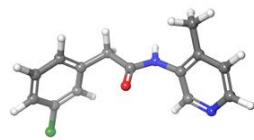

5RH2

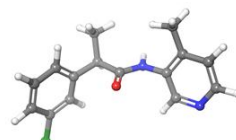

5RH3

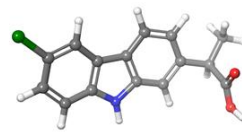

5RH4

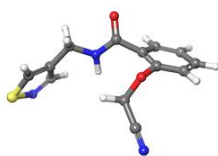

5RH8

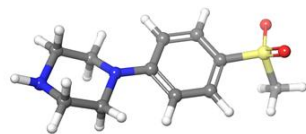

5RHD

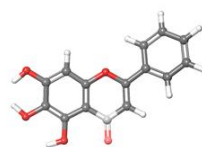

6M2N

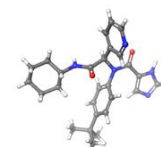

6W63

Small molecules attached non-covalently at outside of the active side

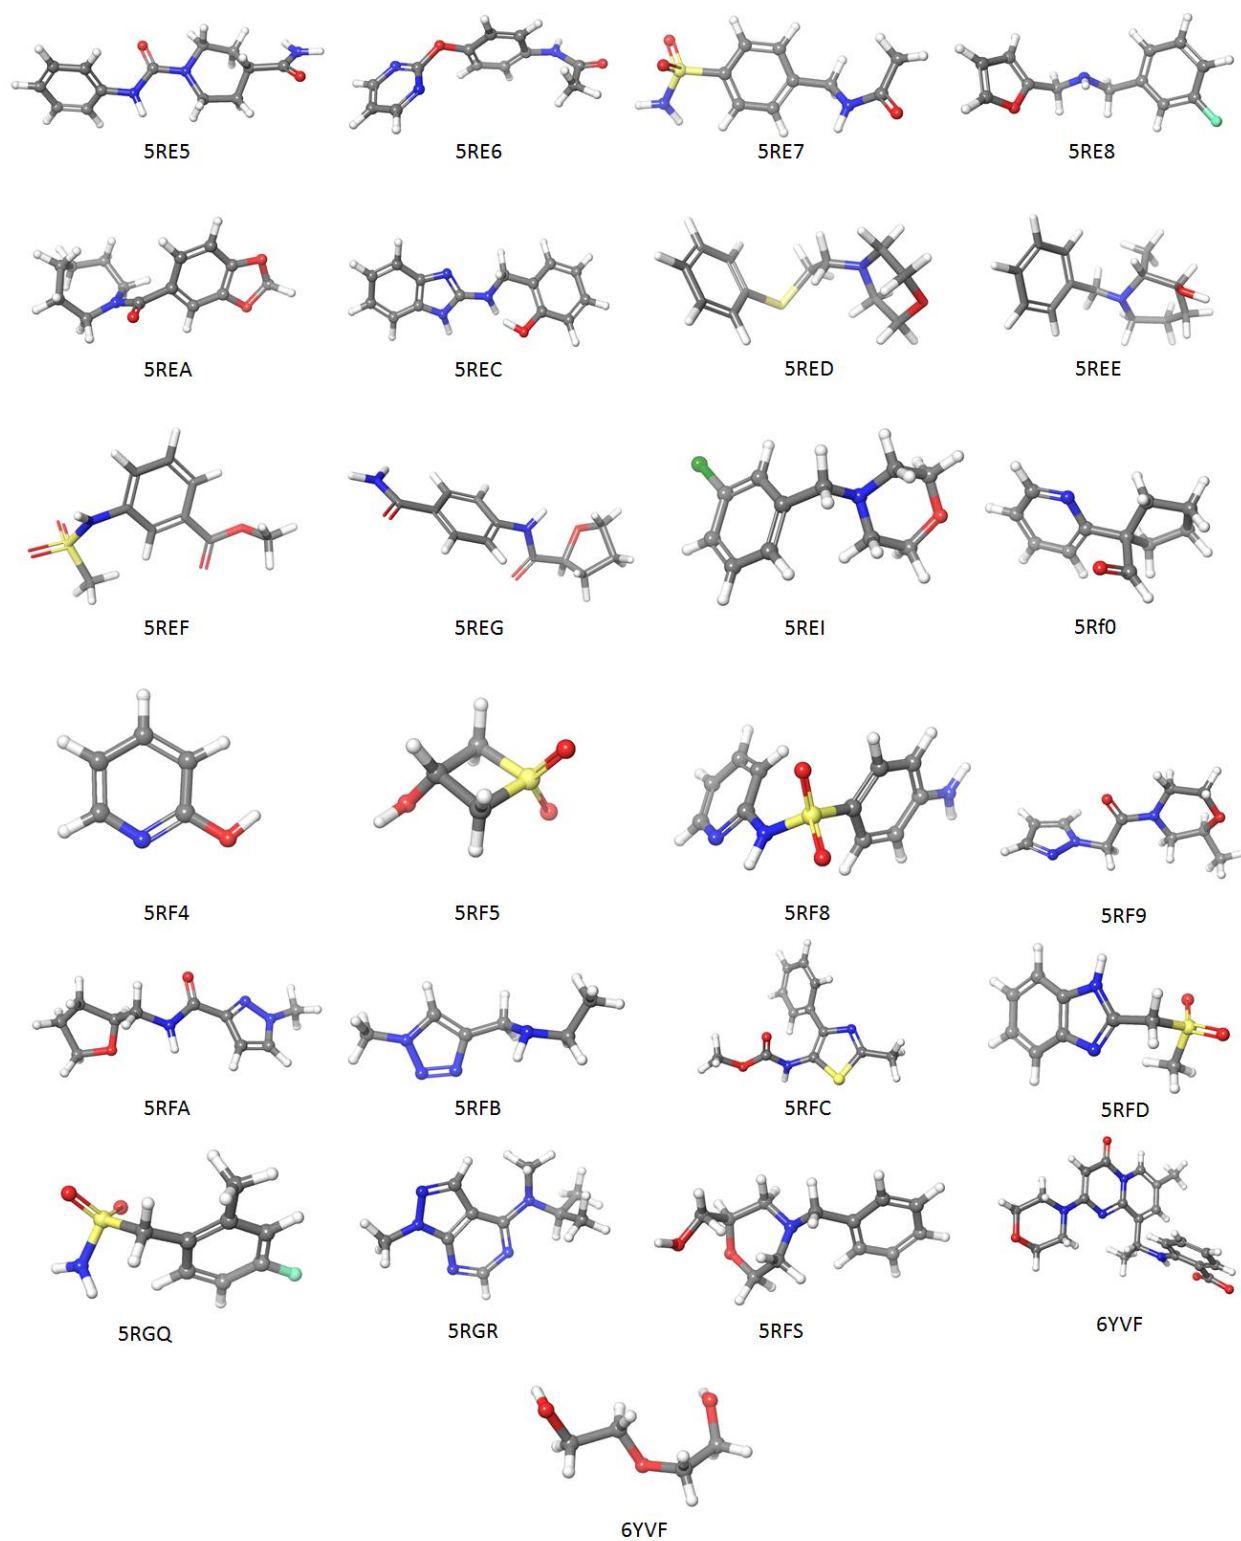

**Figure S5:** Small molecules found in the SARS CoV-2 M<sup>PRO</sup> protein crystal as a bound ligand through different binding modes.



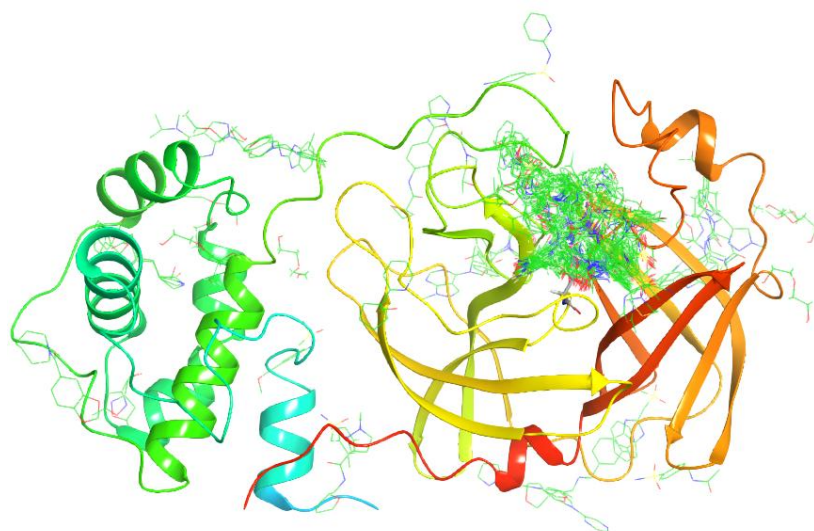

**Figure S6:** Distribution of small molecule ligand around the SARS-CoV-2 M<sup>pro</sup> enzyme.

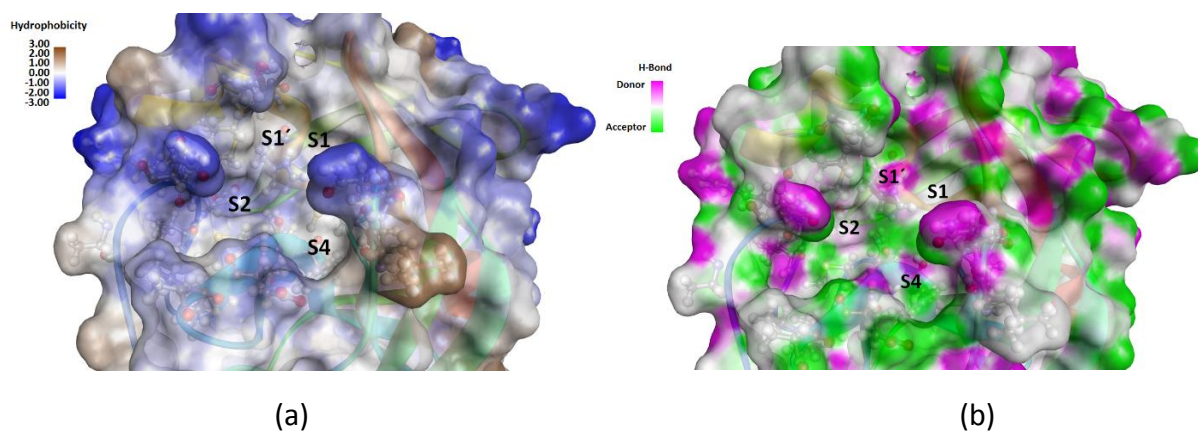

**Figure S7:** The map of (a) hydrophobicity-hydrophilicity and (b) hydrogen bond donor-acceptor regions in the active site of the SARS-CoV-2 M<sup>pro</sup> protein.

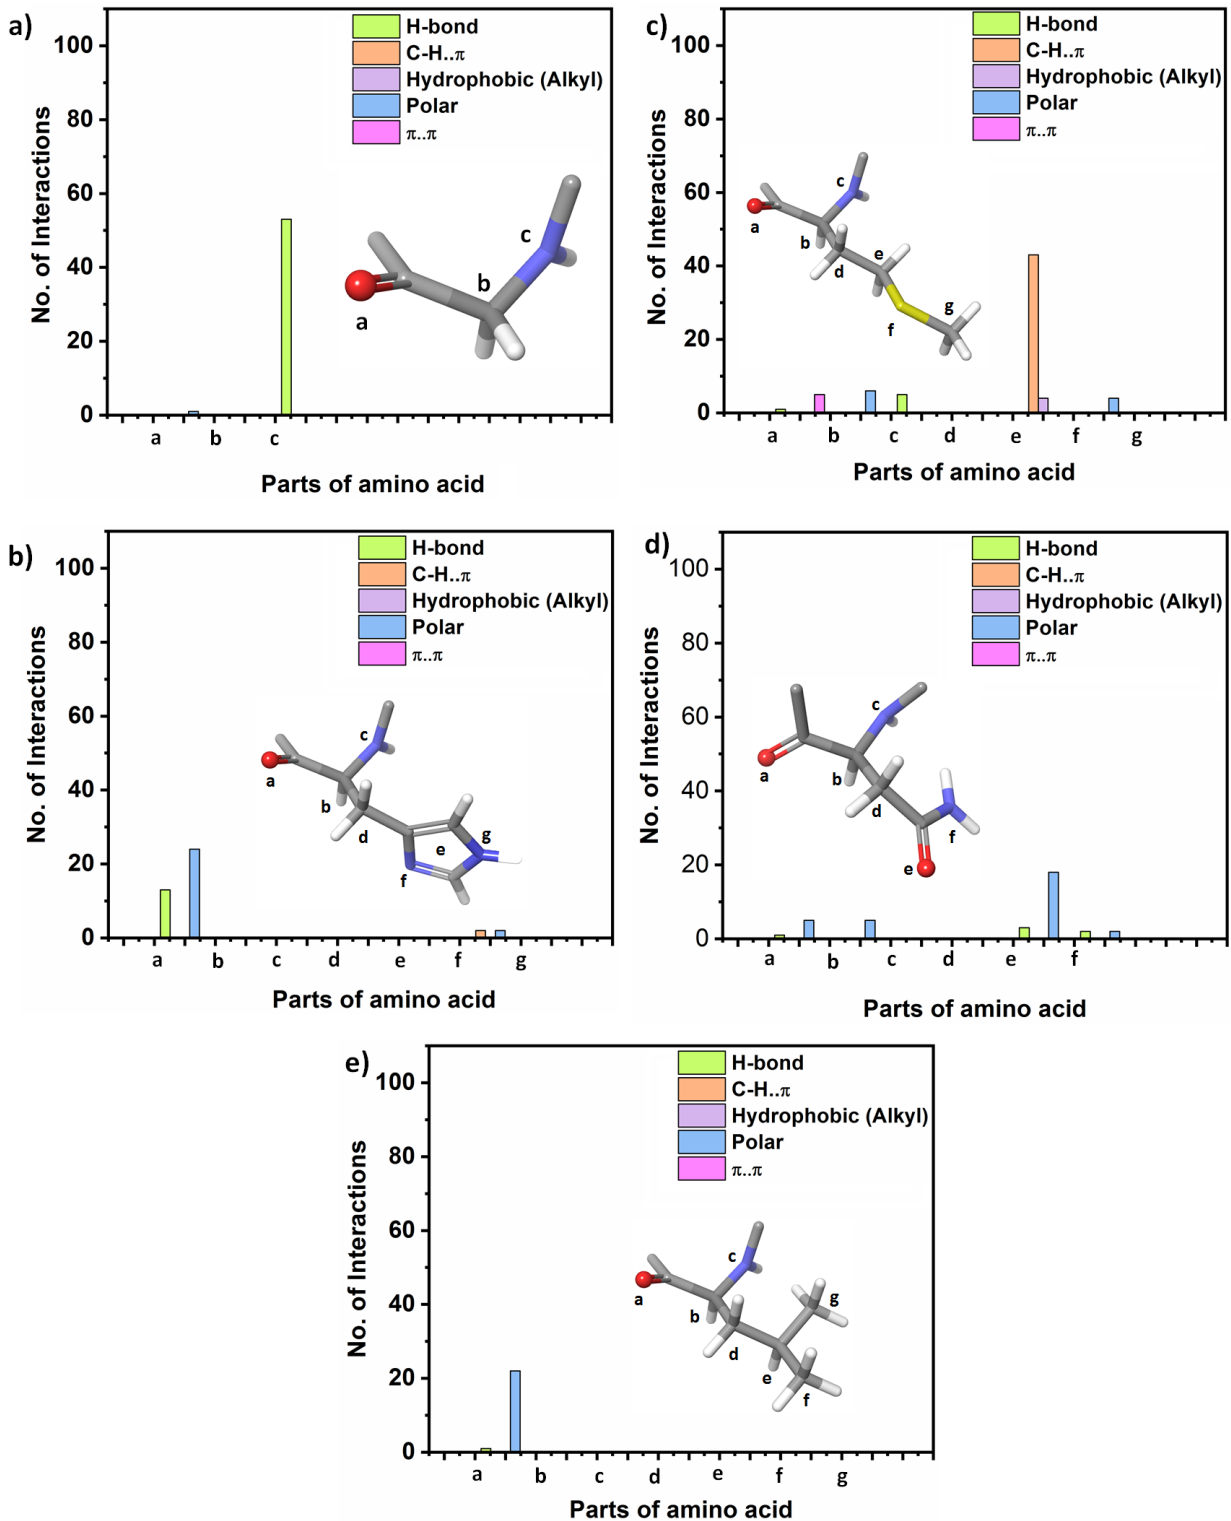

**Figure S8:** In the active site of the SARS-CoV-2 M<sup>PRO</sup> enzyme, the population of H-bond, C-H... $\pi$ , hydrophobic, polar and  $\pi$ ... $\pi$  interactions at different parts of (a) G143; (b) G143, (c) M165, (d) N142 and (e) L141 amino acids.

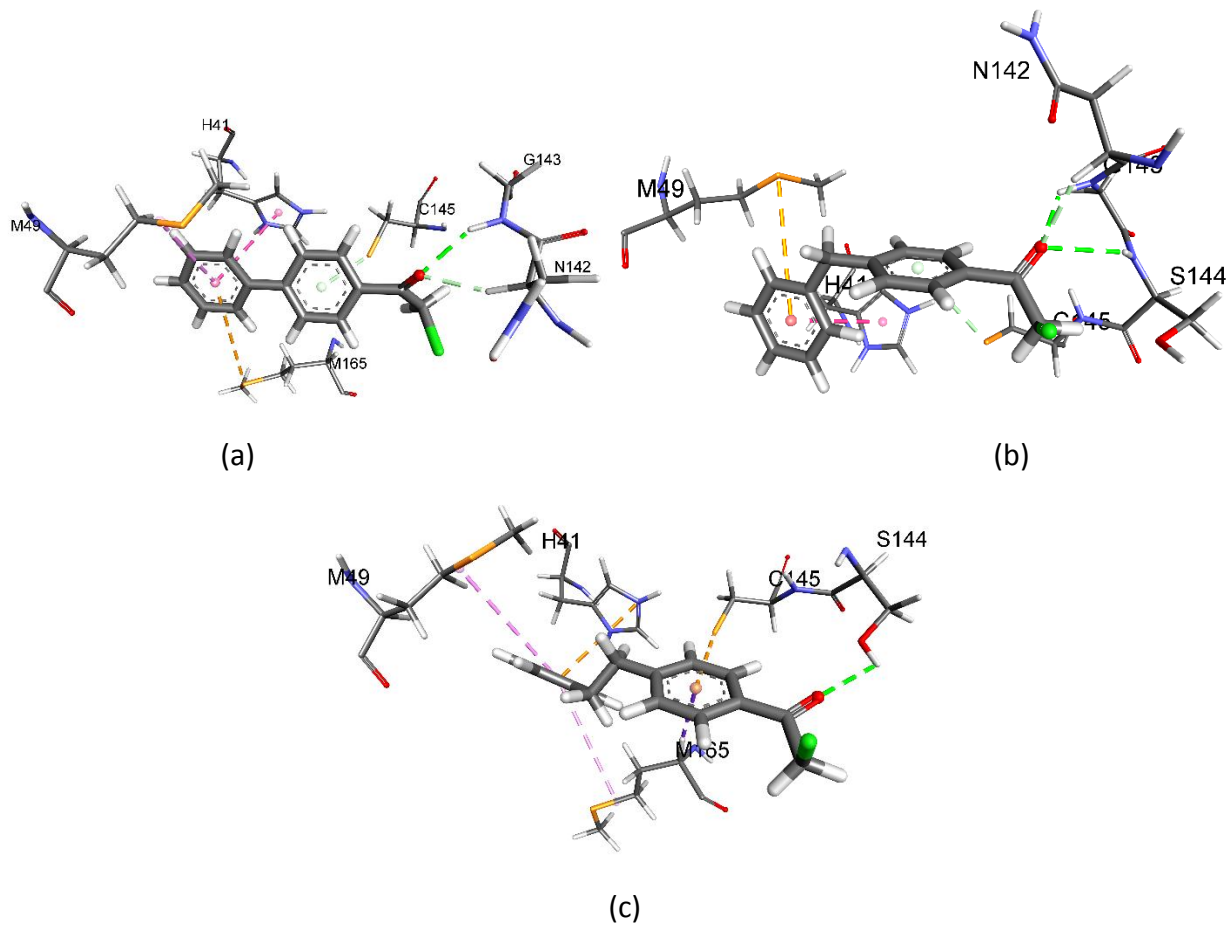

**Figure 9:** Non-covalent interactions of (a) compound 1, (b) compound 2 and (c) compound 3 inside the active site of SARS-CoV-2 M<sup>pro</sup> enzyme.

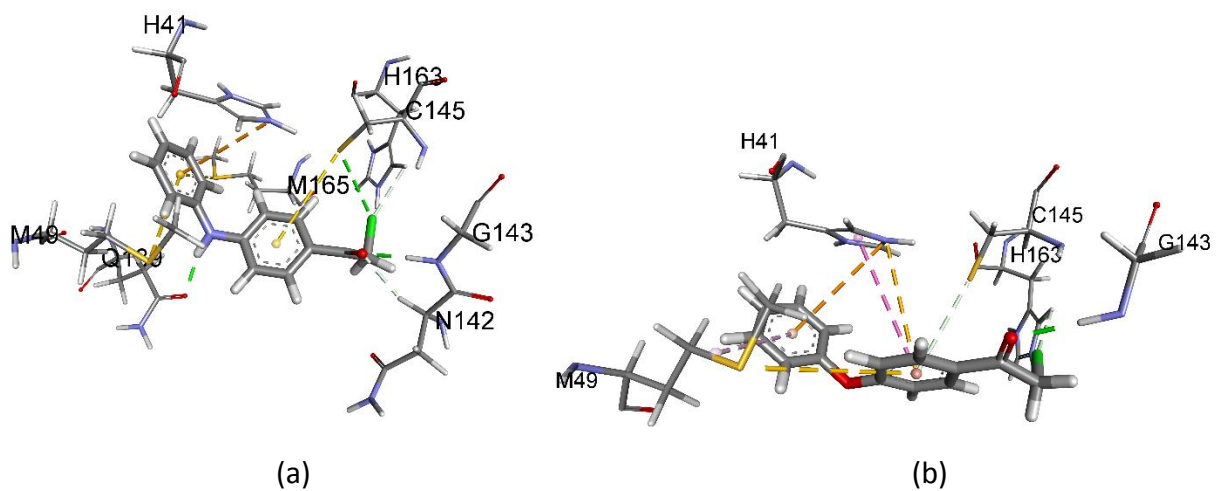

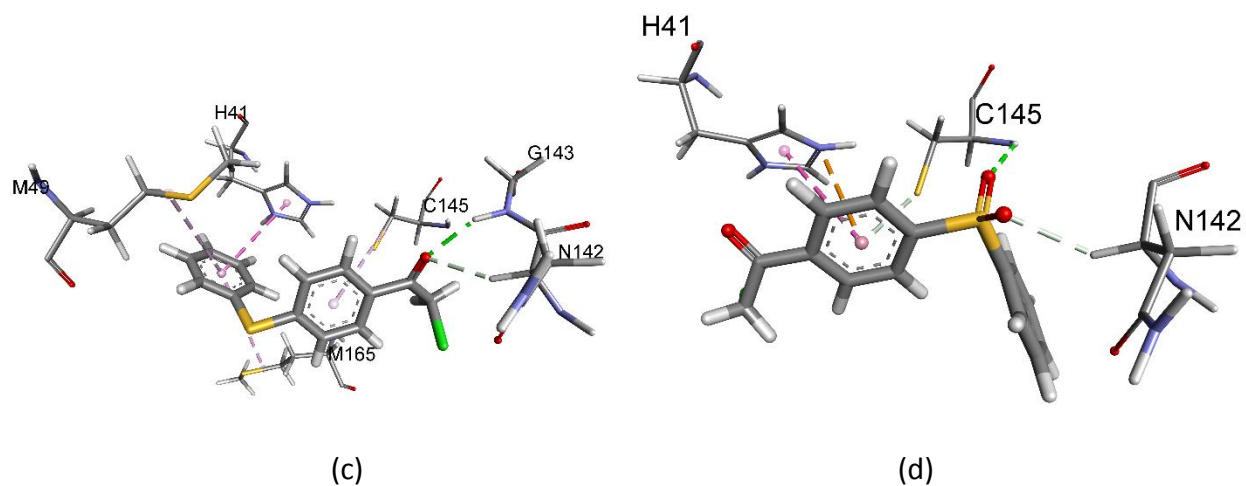

**Fig. S10:** Non-covalent interactions of (a) compound **4**, (b) compound **5**, (c) compound **6** and (d) compound **7** inside the active site of SARS-CoV-2 M<sup>pro</sup> enzyme.

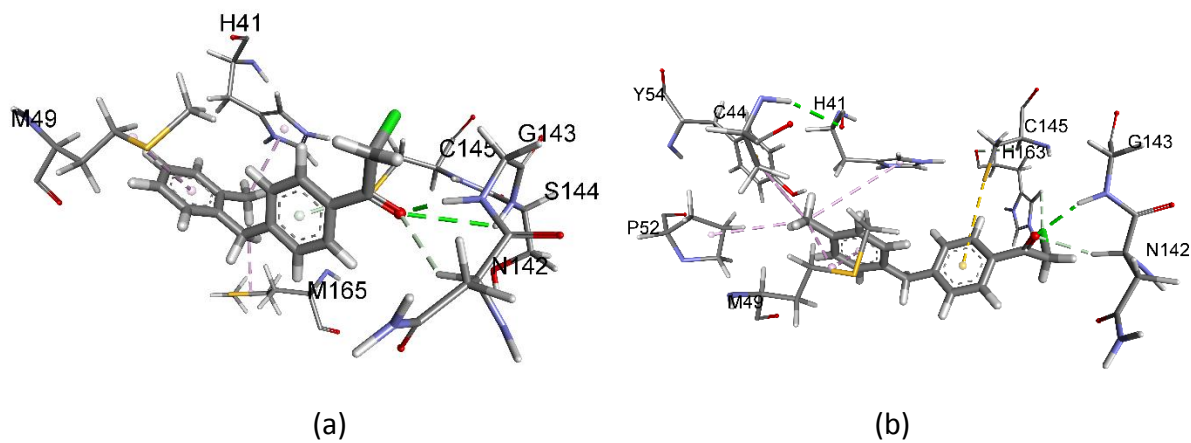

**Fig. S11:** Non-covalent interactions of (a) compound **8** and (b) compound **10** inside the active site of SARS-CoV-2 M<sup>pro</sup> enzyme.

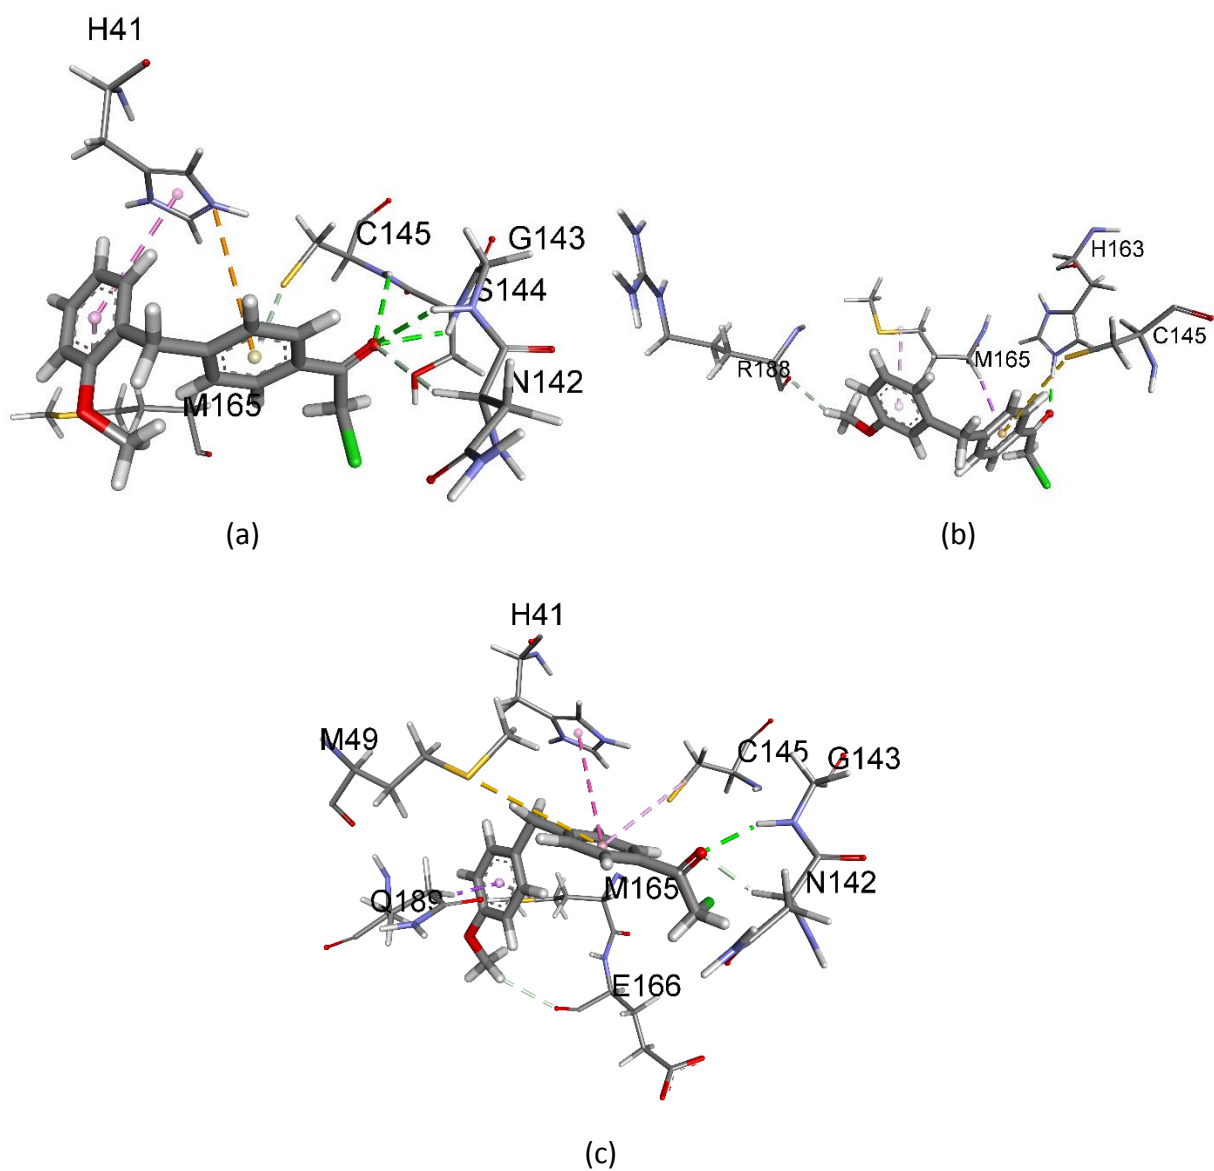

**Fig. S12:** Non-covalent interactions of (a) compound **11**, (b) compound **12** and (c) compound **13** inside the active site of SARS-CoV-2 M<sup>pro</sup> enzyme.

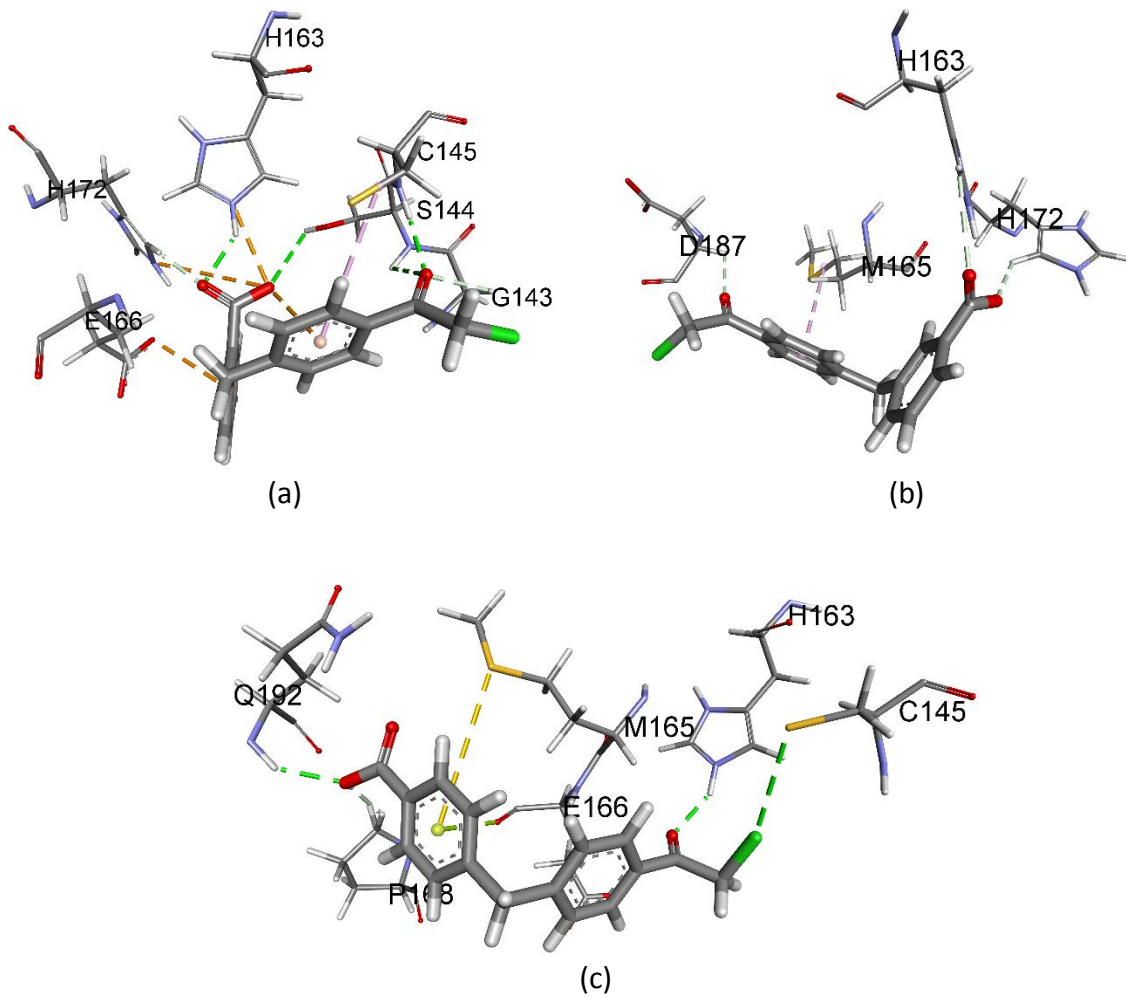

**Fig. S13:** Non-covalent interactions of (a) compound **14**, (b) compound **15** and (c) compound **16** inside the active site of SARS-CoV-2 M<sup>pro</sup> enzyme.

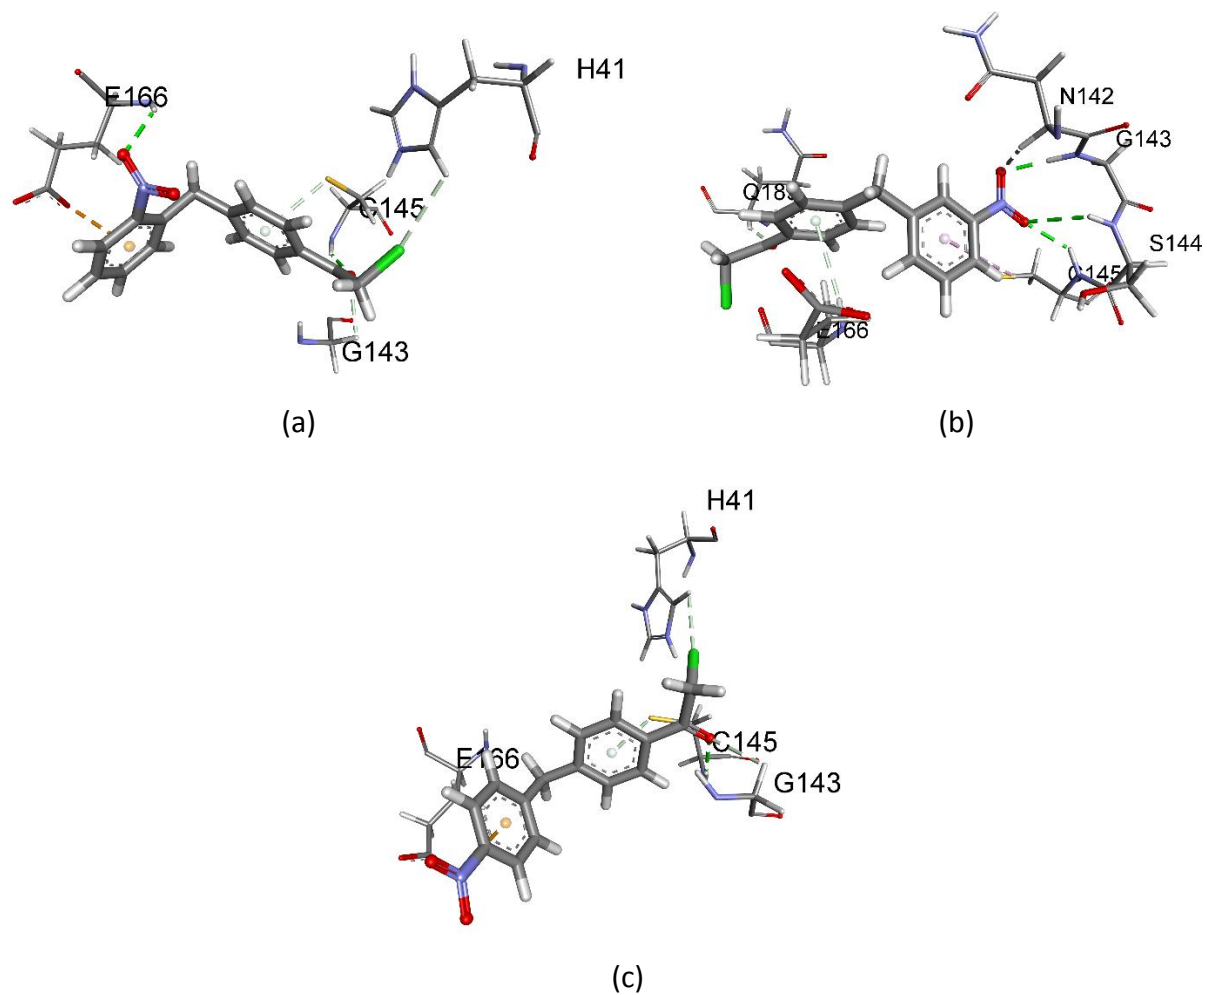

**Fig. S14:** Non-covalent interactions of (a) compound **17**, (b) compound **18** and (c) compound **19** inside the active site of SARS-CoV-2 M<sup>pro</sup> enzyme.

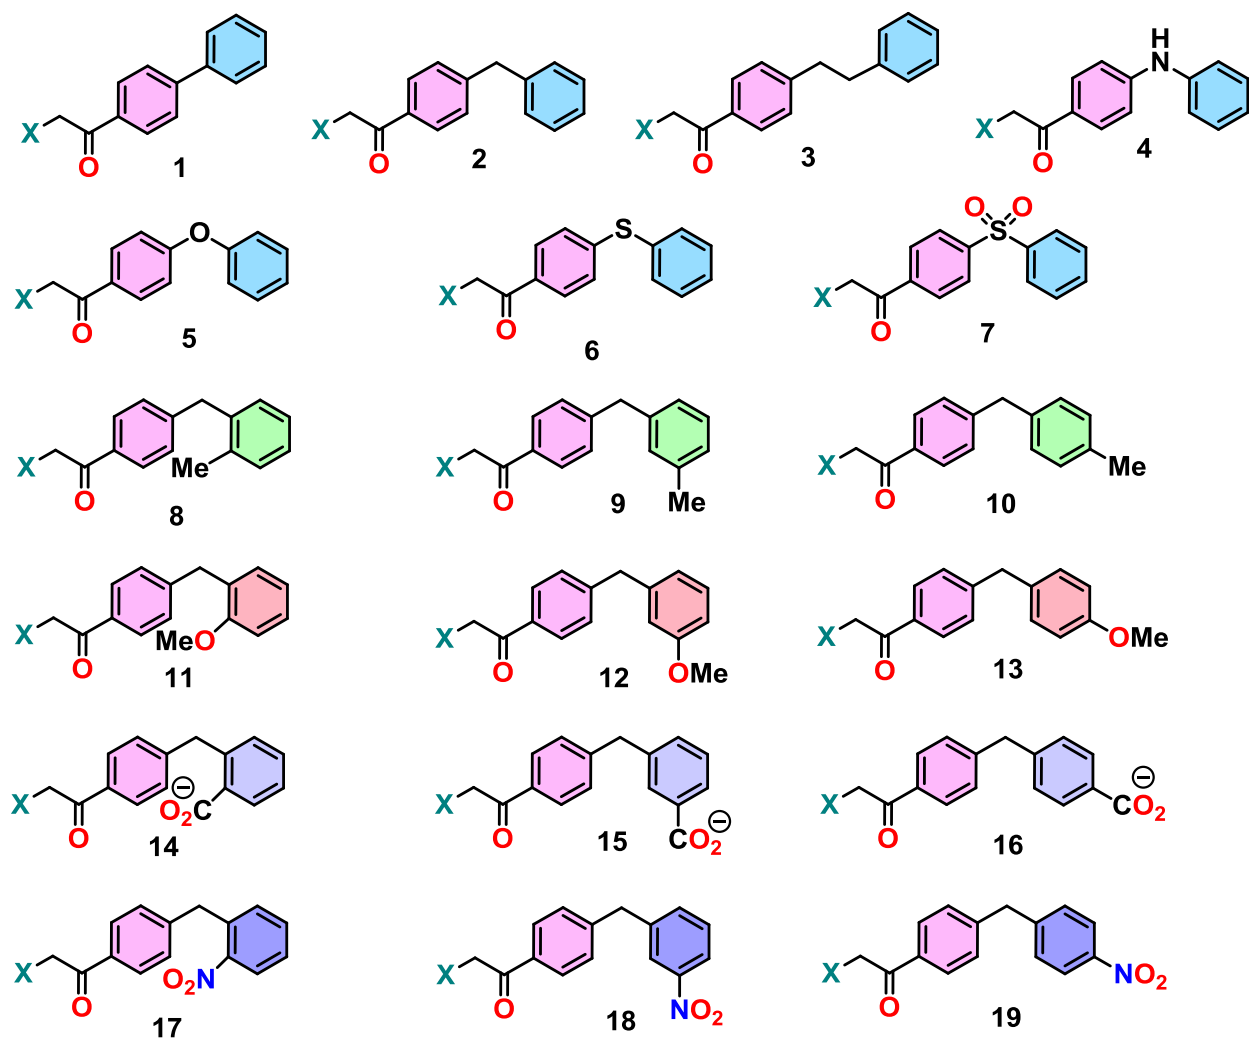

Fig. S15: 2D chemical structure of the designed compound.

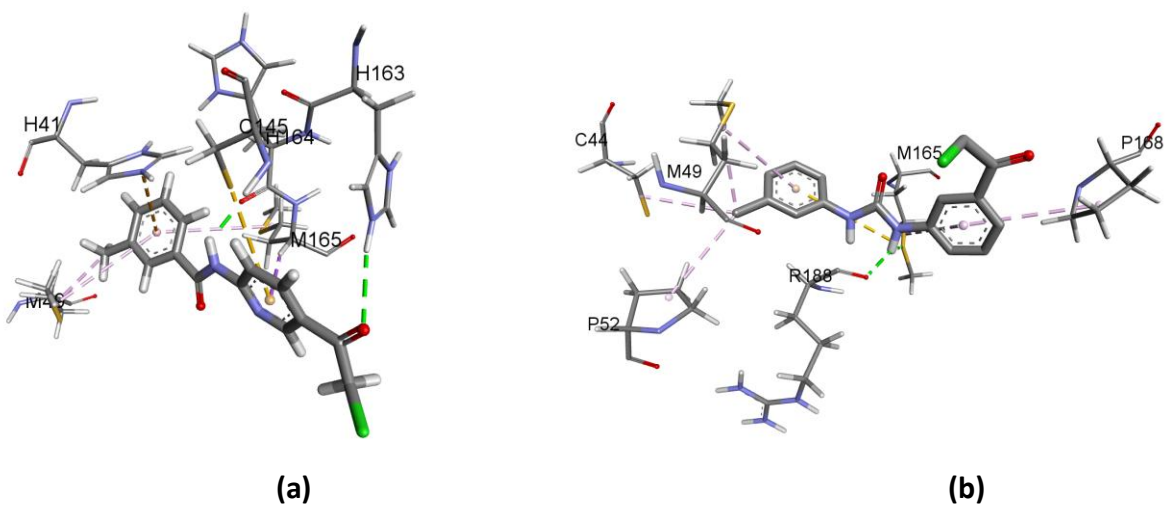



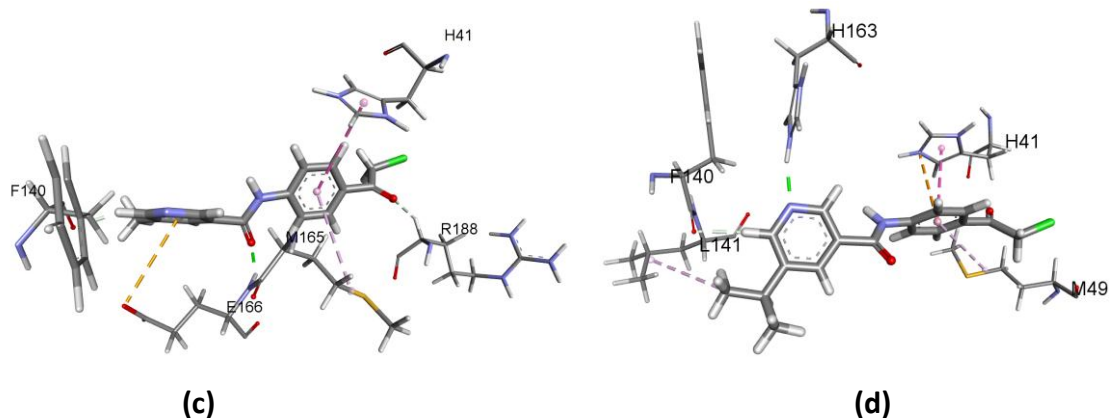

**Fig. S16:** Non-covalent interactions of (a) compound **21**, (b) compound **22**, (c) compound **23** and (d) compound **24** inside the active site of SARS-CoV-2 M<sup>pro</sup> enzyme.

**Table S1.** PDB IDs of SARS-CoV-2 M<sup>pro</sup> enzyme

| Position of Small molecules |                         | PDB ID                                                                                                                                                                                                                                                                                                                                                                                                                        |
|-----------------------------|-------------------------|-------------------------------------------------------------------------------------------------------------------------------------------------------------------------------------------------------------------------------------------------------------------------------------------------------------------------------------------------------------------------------------------------------------------------------|
| No Small molecules (apo)    |                         | 5R8T, 6M2Q, 6M03, 6WQF, 6WTM, 6Y2E, 6Y84, 6Y87, 7BRO.                                                                                                                                                                                                                                                                                                                                                                         |
| Outside of the active site  |                         | 5RE5, 5RE6, 5RE7, 5RE8, 5REA, 5REC, 5RED, 5REE, 5REF, 5REG, 5RF1, 5RF4, 5RF5, 5RF8, 5RF9, 5RFA, 5RFB, 5RFC, 5RFD, 5RGQ, 5RGR, 5RGS, 6VYF.                                                                                                                                                                                                                                                                                     |
| Inside of the active site   | Covalently attached     | 5REJ, 5REK, 5REL, 5REM, 5REN, 5REO, 5REP, 5RER, 5RES, 5RET, 5REU, 5REV, 5REW, 5REX, 5REY, 5RFF, 5RFG, 5RFH, 5RFI, 5RFJ, 5RFK, 5RFL, 5RFM, 5RFN, 5RFO, 5RFP, 5RFQ, 5RFR, 5RFS, 5RET, 5REU, 5REV, 5RFW, 5RFX, 5RFY, 5RFZ, 5RG0, 5RG2, 5RG3, 5RGL, 5RGM, 5RGN, 5RGO, 5RGP, 5RGT, 5RH5, 5RH6, 5RH7, 5RH9, 5RHA, 5RHB, 5RHC, 5RHE, 5RHF, 6LU7, 6QMQ, 6LXE, 6MOK, 6WNP, 6WTJ, 6WTK, 6WTM, 6Y2F, 6Y2G, 6Y7M, 7BQY, 7BRP, 7BRR, 7BUY. |
|                             | Non-covalently attached | 5R7Y, 5R7Z, 5R80, 5R81, 5R82, 5R83, 5R84, 5R89, 5RE4, 5RE9, 5REB, 5REH, 5REZ, 5RF1, 5RF2, 5RF3, 5RF6, 5RF7, 5REE, 5RG1, 5RG2, 5RG3, 5RG4, 5RG8, 5RHD, 6M2N, 6W63.                                                                                                                                                                                                                                                             |

**Table S2.** The p-values for testing the difference between each of amino acids

|       | H41     | C145   | M49    | G143   | E166   | M165   | H164   | N142   | L141  | S144   | C44    | P168   | Q189   | H163   | R188   | A 191  | S46 | L167 | V 186 | D187 |  |
|-------|---------|--------|--------|--------|--------|--------|--------|--------|-------|--------|--------|--------|--------|--------|--------|--------|-----|------|-------|------|--|
| H41   |         |        |        |        |        |        |        |        |       |        |        |        |        |        |        |        |     |      |       |      |  |
| C145  | 0.063   |        |        |        |        |        |        |        |       |        |        |        |        |        |        |        |     |      |       |      |  |
| M49   | 0.00049 | 0.0375 |        |        |        |        |        |        |       |        |        |        |        |        |        |        |     |      |       |      |  |
| G143  | 1.9E-09 | 5E-06  | 0.0034 |        |        |        |        |        |       |        |        |        |        |        |        |        |     |      |       |      |  |
| E166  | 1.1E-09 | 3E-06  | 0.0026 | 0.4614 |        |        |        |        |       |        |        |        |        |        |        |        |     |      |       |      |  |
| M165  | 4E-14   | 6E-10  | 5E-06  | 0.0374 | 0.0459 |        |        |        |       |        |        |        |        |        |        |        |     |      |       |      |  |
| H164  | 0       | 2E-12  | 5E-08  | 0.003  | 0.004  | 0.1626 |        |        |       |        |        |        |        |        |        |        |     |      |       |      |  |
| N142  | 0       | 3E-14  | 1E-08  | 0.0013 | 0.0018 | 0.1056 | 0.3947 |        |       |        |        |        |        |        |        |        |     |      |       |      |  |
| L141  | 0       | 5E-14  | 8E-10  | 0.0002 | 0.0003 | 0.0354 | 0.2027 | 0.286  |       |        |        |        |        |        |        |        |     |      |       |      |  |
| S144  | 0       | 0      | 1E-14  | 5E-08  | 8E-08  | 9E-05  | 0.0022 | 0.0047 | 0.02  |        |        |        |        |        |        |        |     |      |       |      |  |
| C44   | 0       | 0      | 4E-15  | 2E-08  | 3E-08  | 4E-05  | 0.0012 | 0.0026 | 0.012 | 0.4137 |        |        |        |        |        |        |     |      |       |      |  |
| P168  | 0       | 0      | 4E-15  | 2E-08  | 3E-08  | 4E-05  | 0.0012 | 0.0026 | 0.012 | 0.4137 | 0.5    |        |        |        |        |        |     |      |       |      |  |
| Q189  | 0       | 0      | 4E-15  | 2E-08  | 3E-08  | 4E-05  | 0.0012 | 0.0026 | 0.012 | 0.4137 | 0.5    | 0.5    |        |        |        |        |     |      |       |      |  |
| H163  | 0       | 0      | 0      | 3E-10  | 5E-10  | 1E-06  | 5E-05  | 0.0001 | 8E-04 | 0.1126 | 0.1587 | 0.1587 | 0.1587 |        |        |        |     |      |       |      |  |
| R188  | 0       | 0      | 0      | 3E-11  | 4E-11  | 1E-07  | 7E-06  | 2E-05  | 1E-04 | 0.0354 | 0.0544 | 0.0544 | 0.0544 | 0.2637 |        |        |     |      |       |      |  |
| A 191 | 0       | 0      | 0      | 7E-12  | 1E-11  | 4E-08  | 2E-06  | 6E-06  | 4E-05 | 0.0163 | 0.0261 | 0.0261 | 0.0261 | 0.1587 | 0.3527 |        |     |      |       |      |  |
| S46   | 0       | 0      | 0      | 2E-12  | 3E-12  | 1E-08  | 6E-07  | 2E-06  | 1E-05 | 0.0063 | 0.0105 | 0.0105 | 0.0105 | 0.0787 | 0.2073 | 0.3274 |     |      |       |      |  |
| L167  | 0       | 0      | 0      | 2E-12  | 3E-12  | 1E-08  | 6E-07  | 2E-06  | 1E-05 | 0.0063 | 0.0105 | 0.0105 | 0.0105 | 0.0787 | 0.2073 | 0.3274 | 0.5 |      |       |      |  |
| V 186 | 0       | 0      | 0      | 2E-12  | 3E-12  | 1E-08  | 6E-07  | 2E-06  | 1E-05 | 0.0063 | 0.0105 | 0.0105 | 0.0105 | 0.0787 | 0.2073 | 0.3274 | 0.5 | 0.5  |       |      |  |
| D187  | 0       | 0      | 0      | 2E-12  | 3E-12  | 1E-08  | 6E-07  | 2E-06  | 1E-05 | 0.0063 | 0.0105 | 0.0105 | 0.0105 | 0.0787 | 0.2073 | 0.3274 | 0.5 | 0.5  | 0.5   |      |  |

**Method of calculations**

|                   |                        |                        |
|-------------------|------------------------|------------------------|
| <b>Group</b>      | <b>1</b>               | <b>2</b>               |
| Sample Size       | $N_1$                  | $N_2$                  |
| Number of Events  | $X_1$                  | $X_2$                  |
| Event Rate        | $\lambda_1$            | $\lambda_2$            |
| Distribution of X | Poisson( $\lambda_1$ ) | Poisson( $\lambda_2$ ) |

Mathews (2010) proposed two test statistics that can be used to test statistical hypotheses about the rate difference. The first is based on the *large-sample z-test* of the hypotheses  $H_0: \lambda_1 = \lambda_2$  versus  $H_a: \lambda_1 \neq \lambda_2$ .

$$Z_{LS} = \frac{\lambda_2 - \lambda_1}{\sqrt{\frac{\lambda_1}{N_1} + \frac{\lambda_2}{N_2}}}$$

$p = P(Z > Z_{LS})$  Where Z follows N (0, 1)

Smith, P.G. and Morrow, R.H. 1996. *Field Trials of Health Intervention in Developing Countries: A Toolbox*. Macmillan Education. Oxford, England.

Campbell, M.J. and Walters, S.J. 2014. *How to Design, Analyze and Report Cluster Randomised Trials in Medicine and Health Related Research*. John Wiley. New York.

**Table S3:** Few examples of crystallographically non-characterized SARS-CoV-2 M<sup>pro</sup> enzyme inhibitor small molecules

| Entry | Structure of molecules                                                              | Reference                                                |
|-------|-------------------------------------------------------------------------------------|----------------------------------------------------------|
| 1     | 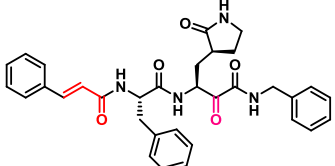   | <i>J. Med. Chem.</i> <b>2020</b> , <i>63</i> , 4562–4578 |
| 2     |    | <i>J. Med. Chem.</i> <b>2020</b> , <i>63</i> , 4562–4578 |
| 3     |    | <i>J. Med. Chem.</i> <b>2020</b> , <i>63</i> , 4562–4578 |
| 4     |    | <i>J. Med. Chem.</i> <b>2020</b> , <i>63</i> , 4562–4578 |
| 5     |  | <i>J. Med. Chem.</i> <b>2020</b> , <i>63</i> , 4562–4578 |
| 6     |  | <i>J. Med. Chem.</i> <b>2020</b> , <i>63</i> , 4562–4578 |
| 7     |  | <i>J. Med. Chem.</i> <b>2020</b> , <i>63</i> , 4562–4578 |
| 8     |  | <i>J. Med. Chem.</i> <b>2020</b> , <i>63</i> , 4562–4578 |
| 9     |  | <i>J. Med. Chem.</i> <b>2020</b> , <i>63</i> , 4562–4578 |

|    |                                                                                     |                                                                 |
|----|-------------------------------------------------------------------------------------|-----------------------------------------------------------------|
| 10 | 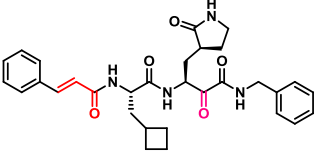   | <i>J. Med. Chem.</i> <b>2020</b> , <i>63</i> , 4562–4578        |
| 11 |    | <i>J. Med. Chem.</i> <b>2020</b> , <i>63</i> , 4562–4578        |
| 12 |    | <i>ACS Med. Chem. Lett.</i> <b>2020</b> , <i>11</i> , 2526–2533 |
| 13 |    | <i>ACS Med. Chem. Lett.</i> <b>2020</b> , <i>11</i> , 2526–2533 |
| 14 |   | <i>ACS Med. Chem. Lett.</i> <b>2020</b> , <i>11</i> , 2526–2533 |
| 15 |  | <i>ACS Med. Chem. Lett.</i> <b>2020</b> , <i>11</i> , 2526–2533 |
| 16 |  | <i>ACS Med. Chem. Lett.</i> <b>2020</b> , <i>11</i> , 2526–2533 |
| 17 |  | <i>ACS Med. Chem. Lett.</i> <b>2020</b> , <i>11</i> , 2526–2533 |
| 18 |  | <i>ACS Med. Chem. Lett.</i> <b>2020</b> , <i>11</i> , 2526–2533 |
| 19 |  | <i>Sci. Adv.</i> <b>2020</b> , <i>6</i> , eabe0751              |
| 20 |  | <i>Sci. Adv.</i> <b>2020</b> , <i>6</i> , eabe0751              |

|    |                                                                                     |                                                                                                                                             |
|----|-------------------------------------------------------------------------------------|---------------------------------------------------------------------------------------------------------------------------------------------|
| 21 | 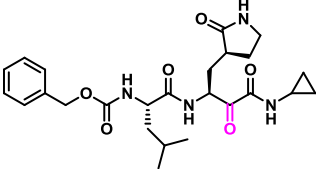   | <i>Sci. Adv.</i> <b>2020</b> , <i>6</i> , eabe0751                                                                                          |
| 22 |    | <i>Sci. Adv.</i> <b>2020</b> , <i>6</i> , eabe0751                                                                                          |
| 23 |    | <i>Sci. Adv.</i> <b>2020</b> , <i>6</i> , eabe0751                                                                                          |
| 24 |    | <i>Sci. Adv.</i> <b>2020</b> , <i>6</i> , eabe0751                                                                                          |
| 25 |    | <i>Sci. Adv.</i> <b>2020</b> , <i>6</i> , eabe0751                                                                                          |
| 26 |  | <i>Sci. Adv.</i> <b>2020</b> , <i>6</i> , eabe0751                                                                                          |
| 27 |  | <i>Nat Chem Biol</i> , <b>2020</b> ,<br><a href="https://doi.org/10.1038/s41589-020-00689-z">https://doi.org/10.1038/s41589-020-00689-z</a> |
| 28 |  | <i>Nat Chem Biol</i> , <b>2020</b> ,<br><a href="https://doi.org/10.1038/s41589-020-00689-z">https://doi.org/10.1038/s41589-020-00689-z</a> |

**Table S4:** Binding energy ( $\Delta G$ ) of ligands found in active site of SARS-CoV-2 M<sup>pro</sup> enzyme through covalent bond.

| Entry | PDB id | Ligand                                                                              | $\Delta G$ (KJ/mol) | Entry | PDB id | Ligand                                                                                | $\Delta G$ (KJ/mol) |
|-------|--------|-------------------------------------------------------------------------------------|---------------------|-------|--------|---------------------------------------------------------------------------------------|---------------------|
| 1.    | 5REJ   | 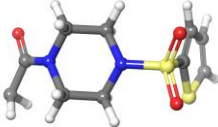 | -24.94              | 35    | 5RFY   |  | -19.28              |

|           |      |                                                                                     |        |           |      |                                                                                       |        |
|-----------|------|-------------------------------------------------------------------------------------|--------|-----------|------|---------------------------------------------------------------------------------------|--------|
| <b>2.</b> | 5REK | 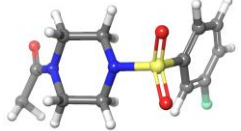   | -26.92 | <b>36</b> | 5RFZ |    | -15.92 |
| <b>3.</b> | 5REL |    | -25.24 | <b>37</b> | 5RG0 |    | -14.66 |
| <b>4.</b> | 5REM |    | -21.71 | <b>38</b> | 5RG2 |    | -12.55 |
| <b>5.</b> | 5REN |    | -23.39 | <b>39</b> | 5RG3 |    | -10.25 |
| <b>6.</b> | 5REO |   | -21.50 | <b>40</b> | 5RGL |   | -27.26 |
| <b>7.</b> | 5REP |  | -24.74 | <b>41</b> | 5RGM |  | -23.05 |
| <b>8.</b> | 5RER |  | -24.36 | <b>42</b> | 5RGN |  | -28.10 |
| <b>9.</b> | 5RES |  | -24.25 | <b>43</b> | 5RGO |  | -25.99 |
| <b>10</b> | 5RET |  | -21.38 | <b>44</b> | 5RGP |  | -17.59 |
| <b>11</b> | 5REU |  | -21.21 | <b>45</b> | 5RGT |  | -30.61 |

|           |      |                                                                                     |        |           |      |                                                                                       |        |
|-----------|------|-------------------------------------------------------------------------------------|--------|-----------|------|---------------------------------------------------------------------------------------|--------|
| <b>12</b> | 5REV | 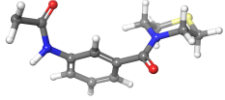   | -28.06 | <b>46</b> | 5RH5 |    | -31.21 |
| <b>13</b> | 5REW |    | -25.28 | <b>47</b> | 5RH6 |    | -34.82 |
| <b>14</b> | 5REX |    | -29.82 | <b>48</b> | 5RH7 |    | -34.39 |
| <b>15</b> | 5REY |   | -28.09 | <b>49</b> | 5RH9 |   | -33.35 |
| <b>16</b> | 5RFF |  | -25.99 | <b>50</b> | 5RHA |  | -24.95 |
| <b>17</b> | 5RFG |  | -23.89 | <b>51</b> | 5RHB |  | -12.34 |
| <b>18</b> | 5RFH |  | -23.14 | <b>52</b> | 5RHC |  | -11.97 |
| <b>19</b> | 5RFI |  | -24.95 | <b>53</b> | 5RHE |  | -22.89 |

|           |      |                                                                                     |        |           |      |                                                                                       |        |
|-----------|------|-------------------------------------------------------------------------------------|--------|-----------|------|---------------------------------------------------------------------------------------|--------|
| <b>20</b> | 5RFJ | 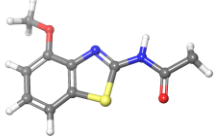   | -17.26 | <b>54</b> | 5RHF |    | -23.86 |
| <b>21</b> | 5RFK |    | -20.45 | <b>55</b> | 6LU7 |    | -8.86  |
| <b>22</b> | 5RFL |    | -20.66 | <b>56</b> | 6YNQ |    | -13.06 |
| <b>23</b> | 5RFM |    | -23.98 | <b>57</b> | 6LZE |    | -29.61 |
| <b>24</b> | 5RFN |   | -24.31 | <b>58</b> | 6MOK |   | -29.86 |
| <b>25</b> | 5RFO |  | -17.34 | <b>59</b> | 6WNP |  | -8.61  |
| <b>26</b> | 5RFP |  | -18.94 | <b>60</b> | 6WTJ |  | -12.39 |
| <b>27</b> | 5RFQ |  | -19.70 | <b>61</b> | 6WTK |  | -12.10 |
| <b>28</b> | 5RFR |  | -26.25 | <b>62</b> | 6WTM |  | -12.51 |



|           |      |                                                                                     |        |           |      |                                                                                       |        |
|-----------|------|-------------------------------------------------------------------------------------|--------|-----------|------|---------------------------------------------------------------------------------------|--------|
| <b>29</b> | 5RFS | 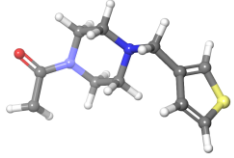   | -26.96 | <b>63</b> | 6Y2F |    | -11.80 |
| <b>30</b> | 5RET |    | -28.14 | <b>64</b> | 6Y2G |    | -1138  |
| <b>31</b> | 5REU |    | -22.76 | <b>65</b> | 6Y7M |    | -16.59 |
| <b>32</b> | 5REV |    | -21.50 | <b>66</b> | 7BQY |    | -15.58 |
| <b>33</b> | 5RFW |   | -21.29 | <b>67</b> | 7BRP |   | -12.22 |
| <b>34</b> | 5RFX |  | -23.48 | <b>68</b> | 7BRR |  | -16.00 |
|           |      |                                                                                     |        | <b>69</b> | 7BUY |  | -7.60  |

**Table S5:** Binding energy ( $\Delta G$ ) of ligands found in active site of SARS-CoV-2 M<sup>pro</sup> enzyme through non-covalent bond.

| Entry    | PDB Id | Ligand                                                                              | $\Delta G$ (KJ/mol) | Entry     | PDB Id | Ligand                                                                                | $\Delta G$ (KJ/mol) |
|----------|--------|-------------------------------------------------------------------------------------|---------------------|-----------|--------|---------------------------------------------------------------------------------------|---------------------|
| <b>1</b> | 5R7Y   | 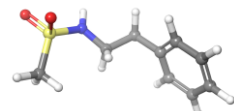 | -18.94              | <b>21</b> | 5RGG   |  | -23.73              |

|           |      |                                                                                     |        |           |      |                                                                                       |        |
|-----------|------|-------------------------------------------------------------------------------------|--------|-----------|------|---------------------------------------------------------------------------------------|--------|
| <b>2</b>  | 5R7Z | 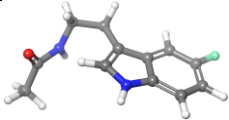   | -20.83 | <b>22</b> | 5RGH |    | -21.42 |
| <b>3</b>  | 5R80 |    | -18.10 | <b>23</b> | 5RGI |    | -23.44 |
| <b>4</b>  | 5R81 |    | -22.26 | <b>24</b> | 5RGJ |    | -23.05 |
| <b>5</b>  | 5R82 |    | -22.09 | <b>25</b> | 5RGK |    | -24.31 |
| <b>6</b>  | 5R83 |    | -24.94 | <b>26</b> | 5RGU |    | -20.12 |
| <b>7</b>  | 5R84 |    | -21.92 | <b>27</b> | 5RGV |    | -28.52 |
| <b>8</b>  | 5R89 |   | -19.53 | <b>28</b> | 5RGW |   | -25.99 |
| <b>9</b>  | 5RE4 |  | -18.44 | <b>29</b> | 5RGX |  | -28.48 |
| <b>10</b> | 5RE9 |  | -26.84 | <b>30</b> | 5RGY |  | -25.91 |
| <b>11</b> | 5REB |  | -24.69 | <b>31</b> | 5RGZ |  | -27.84 |
| <b>12</b> | 5REH |  | -25.07 | <b>32</b> | 5RH0 |  | -25.75 |
| <b>13</b> | 5REZ |  | -23.98 | <b>33</b> | 5RH1 |  | -26.25 |

|           |      |                                                                                     |        |           |          |                                                                                       |        |
|-----------|------|-------------------------------------------------------------------------------------|--------|-----------|----------|---------------------------------------------------------------------------------------|--------|
| <b>14</b> | 5RF1 | 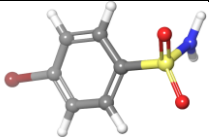   | -21.42 | <b>34</b> | 5RH2     |    | -26.75 |
| <b>15</b> | 5RF2 |    | -4.62  | <b>35</b> | 5RH3     |    | -26.96 |
| <b>16</b> | 5RF3 |    | -10.96 | <b>36</b> | 5RH4     |    | -27.89 |
| <b>17</b> | 5RF6 |    | -23.44 | <b>37</b> | 5RH8     |    | -25.49 |
| <b>18</b> | 5RF7 |    | -28.06 | <b>38</b> | 5RHD     |    | -24.02 |
| <b>19</b> | 5REE |  | -24.28 | <b>39</b> | 6M2<br>N |   | -26.50 |
| <b>20</b> | 5RG1 |  | -20.08 | <b>40</b> | 6W63     |  | -29.06 |
